# Supplementary material for: Integrated Bioinformatics Analysis Identified ASNS and DDIT3 as the Therapeutic Target in Castrate-Resistant Prostate Cancer
Source: MDPI journal article supplement (doi:10.3390/ijms25052836), 2024-02-29
Supplement: s1 [file ijms-2854606-supplementary.pdf › ijms-2854606-supplementary.pdf]

## Supplementary Materials

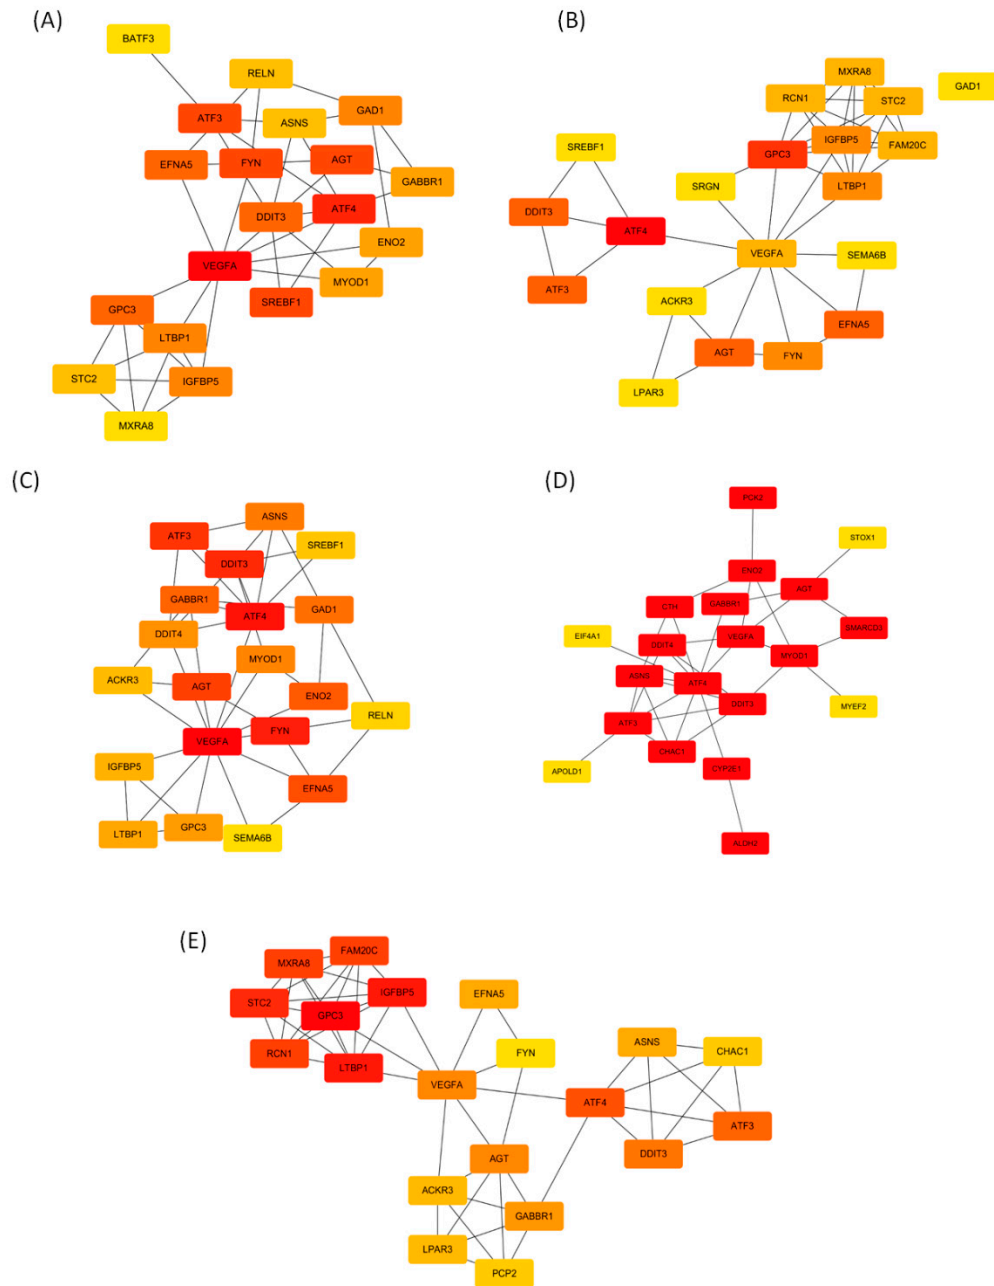

**Supplementary Figure S1.** The hub genes were screened out by five algorithms from CytoHubba. The protein-protein interaction network of hub genes shows the analysis results generated by the algorithms of (A) degree, (B) MNC, (C) EPC, (D) EcCentricity and (E) MCC. The red nodes represent high-scoring genes, whereas the yellow nodes represent low-scoring genes.

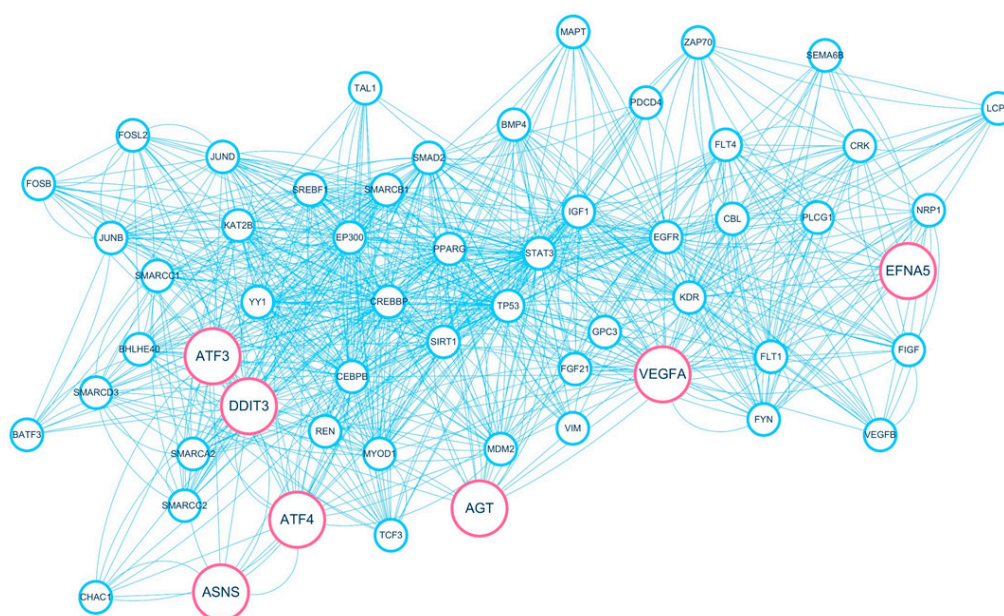

**Supplementary Table S1.** The top 10 GO terms of up-regulated genes

|    |                                                                                                                    |        |                                                                      |
|----|--------------------------------------------------------------------------------------------------------------------|--------|----------------------------------------------------------------------|
| MF | - Positive regulation of protein tyrosine kinase activity                                                          | 0.0041 | SRCIN1, AGT, RELN, CD24                                              |
|    | - Positive regulation of transcription from RNA polymerase II promoter in response to endoplasmic reticulum stress | 0.0095 | ATF4, ATF3, DDIT3                                                    |
|    | - Positive regulation of gene expression                                                                           | 0.0173 | SPRY2, STOX1, ATF4, VIM, VEGFA, POU4F1, PTGFR, FOXD1, CITED2         |
|    | - Gluconeogenesis                                                                                                  | 0.0175 | ATF4, ATF3, ENO2, PCK2                                               |
|    | - E-box binding                                                                                                    | 0.0008 | ASCL2, MYOD1, LMO2, BHLHE40, BHLHE41                                 |
|    | - RNA polymerase II regulatory region sequence-specific DNA binding                                                | 0.0011 | MYOD1, HLF, STOX1, ATF4, ATF3, HMX1, LMO2, DBP, ZNF711, ALX4         |
|    | - Transcription corepressor activity                                                                               | 0.0036 | BATF3, ATF3, CBX4, BHLHE40, WTIP, BASP1, BHLHE41, DDIT3, CITED2      |
|    | - RNA polymerase II activating transcription factor binding                                                        | 0.0112 | LMO2, BEX1, BHLHE40, BHLHE41                                         |
|    | - Vascular endothelial growth factor receptor 1 binding                                                            | 0.0244 | VEGFB, VEGFA                                                         |
|    | - RNA polymerase II core promoter proximal region sequence-specific DNA binding                                    | 0.0312 | ASCL2, BATF3, SREBF1, MYOD1, ATF4, ATF3, JUND, BHLHE41, FOXD1, DDIT3 |
|    | - bHLH transcription factor binding                                                                                | 0.0320 | LMO2, BHLHE40, BHLHE41                                               |
|    | - Iron ion binding                                                                                                 | 0.0402 | PLOD2, HBQ1, CYP2E1, SCD5, HBE1, FTH1                                |
|    | - Serine-type peptidase activity                                                                                   | 0.0422 | HTRA1, KLK4, RELN, PRSS16                                            |
|    | - Transcription factor activity, RNA polymerase II distal enhancer sequence-specific binding                       | 0.0474 | MYOD1, POU4F1, BHLHE40, BHLHE41                                      |
| CC | - Postsynaptic membrane                                                                                            | 0.0040 | CNKSR2, SRCIN1, GRIN2C, NLGN4X, GABRA5, GABBR1, NSG1, HTR3A, LIN7A   |
|    | - Neuron projection                                                                                                | 0.0078 | CNKSR2, ATF4, RAB39B, VIM, MAP2, POU4F1, SLC30A3, RGS17, LIN7A       |

|                                         |        |                                                                                                                                                                                                                               |
|-----------------------------------------|--------|-------------------------------------------------------------------------------------------------------------------------------------------------------------------------------------------------------------------------------|
| - Cell junction                         | 0.0094 | SRCIN1, GABRA5, PTPRR, GABBR1, BASP1, RGS17, KCNK1, TMEM163, GRIN2C, NLGN4X, SMAGP, SLC30A3, HTR3A                                                                                                                            |
| - Extracellular region                  | 0.0099 | LTBP1, GABBR1, SERPINE2, VWDE, NPTX2, HTRA1, AGT, SPATA6, CRIM1, SRGN, STC2, RNASE4, KLK4, CA11, APOLD1, FGF21, PTGFR, COL5A1, EPHA3, VEGFB, MUCL1, CD163L1, FBLN2, LAMC3, C5ORF38, VEGFA, EGFL8, SUS4, TMSB4X, EFNA5, IGFBP5 |
| - Filopodium                            | 0.0104 | SRCIN1, FSCN1, ABI2, IQGAP2, CD302                                                                                                                                                                                            |
| proteinaceous extracellular matrix      | 0.0156 | SMOC2, LTBP1, GPC3, FBLN2, LAMC3, GPC6, VEGFA, RELN, COL5A1                                                                                                                                                                   |
| - Integral component of plasma membrane | 0.0189 | IL27RA, GABBR1, TSPAN7, LPAR3, FXD5, GPC3, BEST1, ROBO1, GRIN2C, GPC6, SLC18B1, SMAGP, SLC39A8, SLC30A3, SLC4A4, GABRA5, NPR3, PCDH7, KCNK1, PTGFR, ABCG1, EPHA3, SEMA6B, EPHA6, NLGN4X, SGCE, BMPR1B                         |
| - Postsynaptic density                  | 0.0235 | CNKSR2, SRCIN1, FYN, GRIN2C, MAPT, NLGN4X, LIN7A                                                                                                                                                                              |
| - CHOP-ATF4 complex                     | 0.0238 | ATF4, DDIT3                                                                                                                                                                                                                   |
| - CHOP-ATF3 complex                     | 0.0238 | ATF3, DDIT3                                                                                                                                                                                                                   |

Supplementary Table S2. The top 10 GO terms of down-regulated genes

| Category | GO_Term                              | P-Value  | Associated Genes                                                                                                                                                                                                                   |
|----------|--------------------------------------|----------|------------------------------------------------------------------------------------------------------------------------------------------------------------------------------------------------------------------------------------|
| BP       | - Nucleosome assembly                | 3.05E-17 | HIST4H4, HIST1H2BC, HIST1H2BD, HIST1H1C, HIST1H2BF, HIST1H2BG, NAP1L5, HIST2H3D, HIST2H2BC, HIST1H2BK, HIST1H2BL, HIST2H2BE, HIST2H2BF, HIST1H2BJ, HIST1H3A, HIST1H4E, HIST1H3D, HIST1H3E, HIST3H2BB, HIST1H4J, HIST1H3H, HIST1H4H |
|          | - Cellular protein metabolic process | 1.60E-10 | ODAM, HIST4H4, KLK3, ADORA2A, IGF1, HIST2H3D, TTR, APP, SAA1, HIST1H3A, HIST1H4E, HIST1H3D, HIST1H3E, HIST1H4J, HIST1H3H, HIST1H4H                                                                                                 |

|    |                                                      |          |                                                                                                                                                                                                                                                                                                            |
|----|------------------------------------------------------|----------|------------------------------------------------------------------------------------------------------------------------------------------------------------------------------------------------------------------------------------------------------------------------------------------------------------|
| MF | - Antibacterial humoral response                     | 1.09E-08 | APP, HIST1H2BC, HIST1H2BD, ADM, HIST1H2BK, HIST1H2BF, HIST2H2BE, HIST1H2BG, HIST1H2BJ, SLPI                                                                                                                                                                                                                |
|    | - Chromatin silencing at rDNA                        | 4.61E-08 | HIST4H4, HIST1H3A, HIST1H4E, HIST1H3D, HIST1H3E, HIST1H4J, HIST1H3H, HIST1H4H, HIST2H3D                                                                                                                                                                                                                    |
|    | - Telomere organization                              | 8.46E-08 | HIST4H4, HIST1H3A, HIST1H4E, HIST1H3D, HIST1H3E, HIST1H4J, HIST1H3H, HIST1H4H                                                                                                                                                                                                                              |
|    | - DNA replication-dependent nucleosome assembly      | 3.01E-07 | HIST4H4, HIST1H3A, HIST1H4E, HIST1H3D, HIST1H3E, HIST1H4J, HIST1H3H, HIST1H4H                                                                                                                                                                                                                              |
|    | - Negative regulation of gene expression, epigenetic | 5.45E-07 | HIST4H4, HIST1H3A, HIST1H4E, HIST1H3D, HIST1H3E, HIST1H4J, HIST1H3H, HIST1H4H, HIST2H3D                                                                                                                                                                                                                    |
|    | - Innate immune response in mucosa                   | 1.21E-06 | HIST1H2BC, HIST1H2BD, HIST1H2BK, HIST1H2BF, HIST2H2BE, HIST1H2BG, HIST1H2BJ                                                                                                                                                                                                                                |
|    | - Protein heterotetramerization                      | 2.14E-06 | HIST4H4, HIST1H3A, HIST1H4E, HIST1H3D, HIST1H3E, HIST1H4J, HIST1H3H, HIST1H4H                                                                                                                                                                                                                              |
|    | - Positive regulation of gene expression, epigenetic | 2.95E-06 | HIST4H4, HIST1H3A, HIST1H4E, HIST1H3D, HIST1H3E, HIST1H4J, HIST1H3H, HIST1H4H, HIST2H3D                                                                                                                                                                                                                    |
|    | - Protein heterodimerization activity                | 2.61E-11 | HIST1H2AC, HIST2H2AA4, HIST4H4, HIST1H2AE, SDCBP2, TTR, BAK1, HIST1H2BK, HIST1H2BL, HIST1H2BJ, ADRA2A, HIST1H4E, HIST3H2BB, HIST1H4J, HIST1H4H, HIST1H2BC, HIST1H2BD, HIST1H2BF, HIST1H2BG, H2AFJ, HIST2H3D, HIST2H2BE, HIST2H2BF, HIST1H3A, HIST1H2AI, HIST1H3D, HIST1H3E, HIST1H2AM, HIST1H2AL, HIST1H3H |
|    | - Histone binding                                    | 6.38E-05 | HIST4H4, TONSL, HIST1H3A, HIST1H4E, HIST1H3D, HIST1H3E, HIST1H4J, HIST1H3H, HIST1H4H, HIST2H3D                                                                                                                                                                                                             |
|    | - Heparin binding                                    | 4.94E-04 | APP, NRP1, SAA1, MMP7, ADAMTS1, FSTL1, SERPIND1, THBS1, FN1, CXCL10                                                                                                                                                                                                                                        |

|    |                                        |          |                                                                                                                                                                                                                                                                      |
|----|----------------------------------------|----------|----------------------------------------------------------------------------------------------------------------------------------------------------------------------------------------------------------------------------------------------------------------------|
|    | - Nucleosomal DNA binding              | 0.004133 | HIST1H3A, HIST1H3D, HIST1H3E, HIST1H3H, HIST2H3D                                                                                                                                                                                                                     |
|    | - Glucuronosyltransferase activity     | 0.007985 | UGT2B17, UGT2B11, UGT2B15, UGT2B28                                                                                                                                                                                                                                   |
|    | - Glycoprotein binding                 | 0.013904 | AZGP1, PIP, ACE2, HSPA5, THBS1                                                                                                                                                                                                                                       |
|    | - Phosphatidylserine binding           | 0.015621 | SYT4, OSBPL8, SYTL2, THBS1                                                                                                                                                                                                                                           |
|    | - MHC class II protein complex binding | 0.02135  | ATP1B1, CD74, HLA-DRA                                                                                                                                                                                                                                                |
|    | - Enzyme binding                       | 0.021971 | DDC, APP, THRB, ADORA2A, HIST1H2AI, SLPI, HSPA5, HIST1H2AM, HIST1H2AL, SLC27A2, GBP1                                                                                                                                                                                 |
|    | - Cytokine binding                     | 0.029586 | NRP1, CD74, GBP1                                                                                                                                                                                                                                                     |
| CC | - Nucleosome                           | 1.10E-23 | HIST1H2AC, HIST2H2AAA4, HIST4H4, HIST1H2AE, HIST1H2BK, HIST1H2BL, HIST1H2BJ, HIST1H4E, HIST1H4J, HIST1H4H, HIST1H2BC, HIST1H2BD, HIST1H1C, HIST1H2BF, HIST1H2BG, H2AFJ, HIST2H3D, HIST2H2BE, HIST1H3A, HIST1H2AI, HIST1H3D, HIST1H3E, HIST1H2AM, HIST1H2AL, HIST1H3H |
|    | - Nuclear nucleosome                   | 8.21E-16 | HIST1H2BC, HIST1H2BD, HIST1H2BF, HIST1H2BG, HIST2H2BC, HIST1H2BK, HIST1H2BL, HIST2H2BE, HIST2H2BF, HIST1H2BJ, HIST1H3A, HIST1H3D, HIST1H3E, HIST3H2BB, HIST1H3H                                                                                                      |

|                         |          |                                                                                                                                                                                                                                                                                                                                                                                                                                                                                                                                                                                                                                                                                                                                                                                                                                                                                                                                                                                                                                                                                                                                                                                                                                                                                                                                                                                                                       |
|-------------------------|----------|-----------------------------------------------------------------------------------------------------------------------------------------------------------------------------------------------------------------------------------------------------------------------------------------------------------------------------------------------------------------------------------------------------------------------------------------------------------------------------------------------------------------------------------------------------------------------------------------------------------------------------------------------------------------------------------------------------------------------------------------------------------------------------------------------------------------------------------------------------------------------------------------------------------------------------------------------------------------------------------------------------------------------------------------------------------------------------------------------------------------------------------------------------------------------------------------------------------------------------------------------------------------------------------------------------------------------------------------------------------------------------------------------------------------------|
| - Extracellular exosome | 1.31E-13 | <p>SNCG, ATP1B1, HIST2H2AA4, HIST4H4, THRB, PGC, CRABP2, UCHL1, MMP7, ECHDC1, FSTL1, SDCBP2, ASAH1, ACTG2, TTR, AZGP1, APP, SAA2, HIST1H2BL, SAA1, PLA1A, DPP4, KCNMA1, TMEM205, DDC, ACTA2, PROSC, H2AFJ, PIGR, NAPRT, SMO, NPC1, HIST2H2BE, HIST2H2BF, PLA2G2A, SLPI, LAMC1, SLC27A2, LCP1, HLA-DRA, MVP, COASY, HIST1H2AC, CAB39L, HIST1H2AE, CLU, UGDH, BROX, MME, CD74, CBR1, FAM213A, HIST1H4E, PIP, TSTA3, HSPA5, FGL1, THBS1, HIST1H4J, HIST1H4H, FN1, HIST1H2BC, HIST1H2BD, S100P, KLK3, HIST1H2BF, HIST1H2BG, VTA1, FUCA2, PSMB8, ACPP, HIST2H3D, LCN2, CBLC, PRADC1, LAMA3, PI3, HIST1H3A, HBZ, ACE2, HIST1H2AI, HIST1H3D, FCGBP, HIST1H3E, SERPIND1, HIST1H2AM, HPGD, HIST1H2AL, HIST1H3H</p> <p>ODAM, NRP1, MSMB, PGC, CLU, MMP7, HFE, FSTL1, ASAH1, SPINK8, CXCL10, AZGP1, TTR, ACTG2, APP, HIST1H2BK, SAA2, SAA1, HIST1H2BJ, PIP, THBS1, ANGPT2, FN1, HIST1H2BC, HIST1H2BD, CES1, ACTA2, KLK3, HIST1H2BF, HIST1H2BG, IGF1, PIGR, FUCA2, ACPP, LCN2, GCG, F5, SEMA4G, ADM, HIST2H2BE, ACE2, PLA2G2A, SLPI, LAMC1, SERPIND1, AGR2, LCP1</p> <p>ODAM, HIST4H4, CLU, MMP7, IFI30, FSTL1, FGF13, JAG1, CXCL10, AZGP1, TTR, COL26A1, APP, SAA1, HIST1H4E, PIP, PLA1A, THBS1, HIST1H4J, ANGPT2, HIST1H4H, FN1, TMEFF2, DEFB132, KLK3, GNRH2, MUC20, IGF1, HIST2H3D, LCN2, GCG, PRADC1, NPC1, LAMA3, F5, ADM, HIST1H3A, VSTM2L, ACE2, PLA2G2A, PLA2G7, HIST1H3D, HIST1H3E, SERPIND1, LAMC1, HIST1H3H, GBP1</p> |
| - Extracellular space   | 2.84E-08 | <p>ODAM, NRP1, MSMB, PGC, CLU, MMP7, HFE, FSTL1, ASAH1, SPINK8, CXCL10, AZGP1, TTR, ACTG2, APP, HIST1H2BK, SAA2, SAA1, HIST1H2BJ, PIP, THBS1, ANGPT2, FN1, HIST1H2BC, HIST1H2BD, CES1, ACTA2, KLK3, HIST1H2BF, HIST1H2BG, IGF1, PIGR, FUCA2, ACPP, LCN2, GCG, F5, SEMA4G, ADM, HIST2H2BE, ACE2, PLA2G2A, SLPI, LAMC1, SERPIND1, AGR2, LCP1</p> <p>ODAM, HIST4H4, CLU, MMP7, IFI30, FSTL1, FGF13, JAG1, CXCL10, AZGP1, TTR, COL26A1, APP, SAA1, HIST1H4E, PIP, PLA1A, THBS1, HIST1H4J, ANGPT2, HIST1H4H, FN1, TMEFF2, DEFB132, KLK3, GNRH2, MUC20, IGF1, HIST2H3D, LCN2, GCG, PRADC1, NPC1, LAMA3, F5, ADM, HIST1H3A, VSTM2L, ACE2, PLA2G2A, PLA2G7, HIST1H3D, HIST1H3E, SERPIND1, LAMC1, HIST1H3H, GBP1</p>                                                                                                                                                                                                                                                                                                                                                                                                                                                                                                                                                                                                                                                                                                           |
| - Extracellular region  | 4.47E-06 | <p>ODAM, HIST4H4, CLU, MMP7, IFI30, FSTL1, FGF13, JAG1, CXCL10, AZGP1, TTR, COL26A1, APP, SAA1, HIST1H4E, PIP, PLA1A, THBS1, HIST1H4J, ANGPT2, HIST1H4H, FN1, TMEFF2, DEFB132, KLK3, GNRH2, MUC20, IGF1, HIST2H3D, LCN2, GCG, PRADC1, NPC1, LAMA3, F5, ADM, HIST1H3A, VSTM2L, ACE2, PLA2G2A, PLA2G7, HIST1H3D, HIST1H3E, SERPIND1, LAMC1, HIST1H3H, GBP1</p>                                                                                                                                                                                                                                                                                                                                                                                                                                                                                                                                                                                                                                                                                                                                                                                                                                                                                                                                                                                                                                                          |

|                                        |          |                                                                                               |
|----------------------------------------|----------|-----------------------------------------------------------------------------------------------|
| - Nuclear chromosome                   | 1.00E-05 | HIST4H4, HIST1H3A, HIST1H4E, HIST1H3D, HIST1H3E, HIST1H4J, HIST1H3H, HIST1H4H                 |
| - Filopodium                           | 5.36E-04 | FAM65B, ACTG2, DNALI1, ACTA2, FGF13, LCP1, ACP1                                               |
| - Platelet alpha granule lumen         | 0.001125 | APP, F5, CLU, IGF1, THBS1, FN1                                                                |
| - Nuclear chromatin                    | 0.001904 | POLR3G, HIST1H2AC, HIST2H2AA4, THRB, HIST1H2AE, HIST1H2AI, H2AFJ, HIST1H2AM, HIST1H2AL, NRIP1 |
| - Nuclear chromosome, telomeric region | 0.002704 | HIST4H4, HIST1H3A, HIST1H4E, HIST1H3D, HIST1H3E, HIST1H4J, HIST1H3H, HIST1H4H                 |

**Supplementary Table S3.** KEGG pathway enrichment of upregulated- and downregulated genes

|                        | KEGG Pathway                   | P-Value  | Associated Genes                                                                                                                                                                                                                                                                         |
|------------------------|--------------------------------|----------|------------------------------------------------------------------------------------------------------------------------------------------------------------------------------------------------------------------------------------------------------------------------------------------|
| <b>Up-regulation</b>   | - PI3K-Akt signaling pathway   | 0.0082   | VEGFB, ATF4, LAMC3, VEGFA, LPAR3, RELN, EFNA5, FGF21, PCK2, COL5A1, DDIT4                                                                                                                                                                                                                |
|                        | - Axon guidance                | 0.0183   | SEMA6B, EPHA6, FYN, ROBO1, EFNA5, EPHA3                                                                                                                                                                                                                                                  |
|                        | - MAPK signaling pathway       | 0.0324   | ATF4, MAPT, JUND, PTPRR, FGF21, GADD45B, DDIT3, PLA2G4D                                                                                                                                                                                                                                  |
| <b>Down-regulation</b> | - Systemic lupus erythematosus | 6.33E-20 | HIST1H2AC, HIST2H2AA4, HIST4H4, HIST1H2AE, HIST1H2BK, HIST1H2BL, HIST1H2BJ, HIST1H4E, HIST3H2BB, HIST1H4J, HIST1H4H, HIST1H2BC, HIST1H2BD, HIST1H2BF, HIST1H2BG, H2AFJ, HIST2H3D, HIST2H2BE, HIST2H2BF, HIST1H3A, HIST1H2AI, HIST1H3D, HIST1H3E, HIST1H2AM, HIST1H2AL, HIST1H3H, HLA-DRA |
|                        | - Alcoholism                   | 7.68E-18 | HIST1H2AC, HIST2H2AA4, HIST4H4, ADORA2A, HIST1H2AE, HIST1H2BK, HIST1H2BL, HIST1H2BJ, HIST1H4E, HIST3H2BB, HIST1H4J, HIST1H4H, DDC, HIST1H2BC, HIST1H2BD, HIST1H2BF, HIST1H2BG, H2AFJ, HIST2H3D, HIST2H2BE,                                                                               |



|                                                      |          |                                                                                                                                                                                                                                                                                 |
|------------------------------------------------------|----------|---------------------------------------------------------------------------------------------------------------------------------------------------------------------------------------------------------------------------------------------------------------------------------|
|                                                      |          | HIST2H2BF, HIST1H3A,<br>HIST1H2AI, HIST1H3D, HIST1H3E,<br>HIST1H2AM, HIST1H2AL,<br>HIST1H3H<br>HIST4H4, HIST1H2BC, HIST1H2BD,<br>HIST1H2BF, STAT5A, HIST1H2BG,<br>BAK1, HIST1H2BK, HIST1H2BL,<br>HIST2H2BE, HIST2H2BF,<br>HIST1H2BJ, HIST1H4E, HIST3H2BB,<br>HIST1H4J, HIST1H4H |
| - Viral carcinogenesis                               | 5.81E-06 |                                                                                                                                                                                                                                                                                 |
| - Ascorbate and<br>aldarate metabolism               | 0.001483 | UGT2B17, UGT2B11, UGDH,<br>UGT2B15, UGT2B28                                                                                                                                                                                                                                     |
| - Pentose and<br>glucuronate<br>interconversions     | 0.003169 | UGT2B17, UGT2B11, UGDH,<br>UGT2B15, UGT2B28                                                                                                                                                                                                                                     |
| - Drug metabolism -<br>other enzymes                 | 0.010485 | UGT2B17, CES1, UGT2B11,<br>UGT2B15, UGT2B28                                                                                                                                                                                                                                     |
| - Transcriptional<br>misregulation in cancer         | 0.012943 | MAF, HIST1H3A, ETV1, IGF1,<br>HIST1H3D, HIST1H3E, HP GD,<br>HIST1H3H, HIST2H3D                                                                                                                                                                                                  |
| - Retinol metabolism                                 | 0.031594 | DHRS3, UGT2B17, UGT2B11,<br>UGT2B15, UGT2B28                                                                                                                                                                                                                                    |
| - Porphyrin and<br>chlorophyll<br>metabolism         | 0.043511 | UGT2B17, UGT2B11, UGT2B15,<br>UGT2B28                                                                                                                                                                                                                                           |
| - Metabolism of<br>xenobiotics by<br>cytochrome P450 | 0.049686 | CBR1, UGT2B17, UGT2B11,<br>UGT2B15, UGT2B28                                                                                                                                                                                                                                     |

**Supplementary Table S4.** qPCR primer pairs.

| Gene  | Forward sequence (5' to 3') | Reverse sequence (5' to 3') |
|-------|-----------------------------|-----------------------------|
| AGT   | AATGACCGCATCAGGGTGG         | GGTTCAGGGTCACCTCCAAG        |
| ASNS  | AAGCCGAGGAGGAGAGTGAG        | TCTCATTTCTGGTGGCAGAGAC      |
| ATF3  | ATGTCCTCTGCGCTGGAATC        | TTGTTTCGGCACTTTGCAGC        |
| ATF4  | ATGGGTTCTCCAGCGACAAG        | AGGGCATCCAAGTCGAACTC        |
| DDIT3 | TTGCCTTTCTCCTTCGGGAC        | AAGCAGGGTCAAGAGTGGTG        |
| EFNA5 | ATGGGAATGTAACCGGCCTC        | TGGGATTGCAGAGGAGATGTAG      |
| VEGFA | CTTCAAGCCATCCTGTGTGC        | TATGTGCTGGCCTTGGTGAG        |
| GAPDH | GCTACAGCAACAGGGTGGTG        | GGTCTACATGGCAACTGTGAGG      |
